# Supplementary material for: Short-Term Growth Hormone Administration Mediates Hepatic Fatty Acid Uptake and De Novo Lipogenesis Gene Expression in Obese Rats
Source: MDPI journal article supplement (doi:10.3390/biomedicines11041050), 2023-03-29

**Title:** Short-Term Growth Hormone Administration Mediates Hepatic Fatty Acid Uptake and De Novo Lipogenesis Gene Expression in Obese Rats

**Authors:** Sutharinee Likitnukul, Sumpun Thammacharoen, Orada Sriwatananukulkit, Chanathip Duangtha, Ruedee Hemstapat, Chotchanit Sunrat, Supachoke Mangmool and Darawan Pinthong \*

**Type of manuscript:** Original Research Article

**Supplementary materials**

**Figure S1.** a) The relative percentage of body fat mass in the control group; \* represents statistical significance between GH and NSS groups ( $p < 0.05$ ). b) The relative percentage of body fat mass in the DIO group. c) The relative percentage of body fat mass in the DR group. Isca: interscapular adipose tissue, Ing: inguinal adipose tissue, Mesen: mesenteric adipose tissue, Retro: retroperitoneal and perirenal adipose tissue, Epi: epididymal adipose tissue.

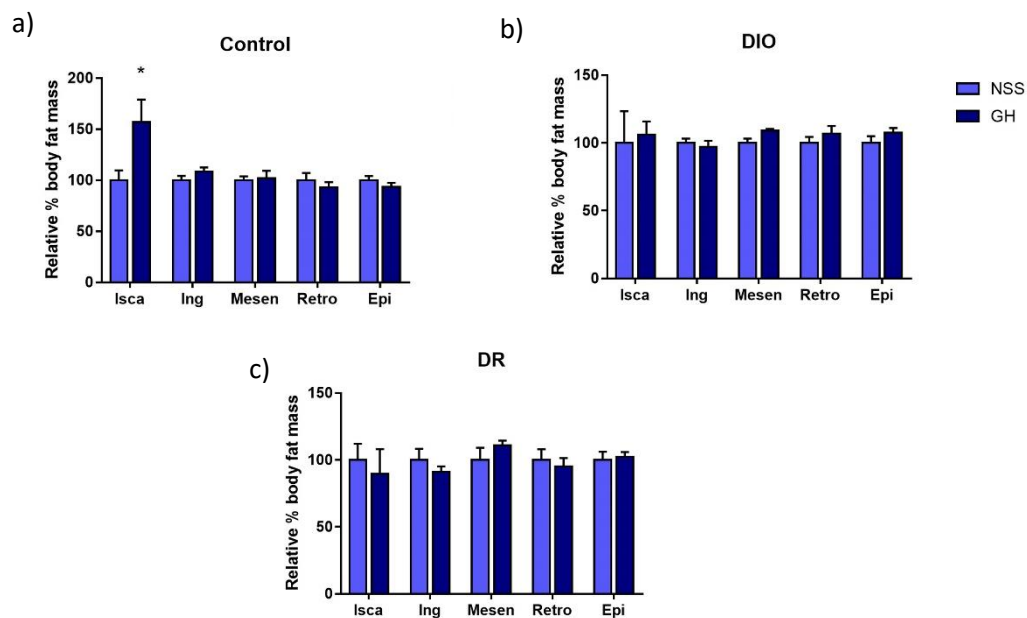

Supplement: s1 [file s1]
